# Supplementary material for: Different pH triggered aggregate morphologies in sodium oleate–cationic surfactants mixed systems
Source: Royal Society of Chemistry journal article supplement (doi:10.1039/c6nj03871a), 2017-01-01
Supplement: c6nj03871a1.pdf [file c6nj03871a1.pdf]

Supplementary material

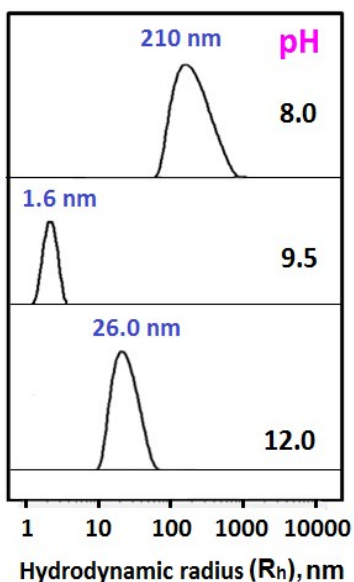

**Fig.1.** Hydrodynamic radius of NaOl (100 mM) at different pH and 30 °C

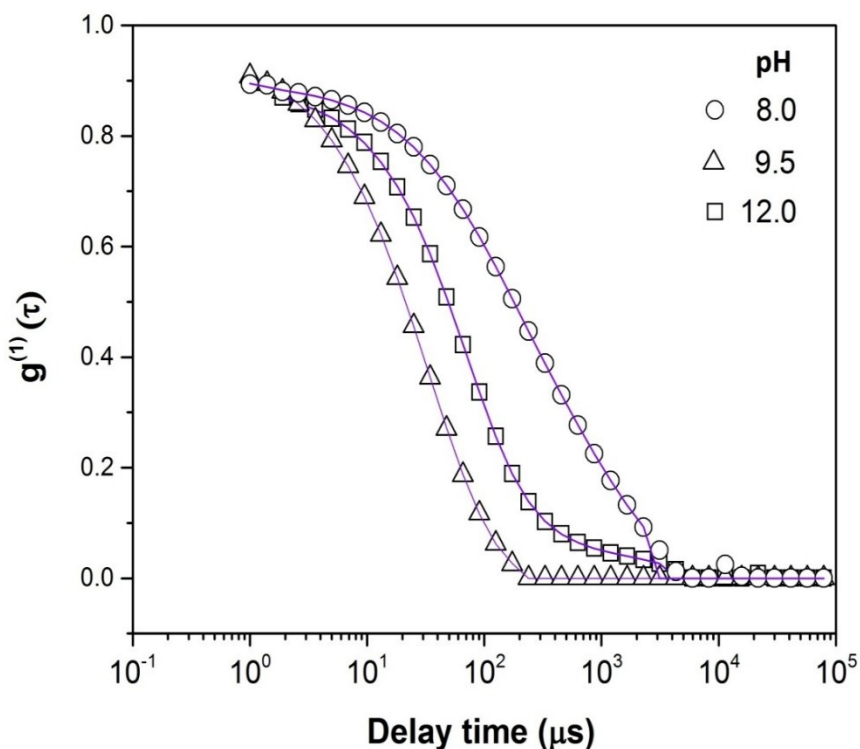

**Fig. 2.** Correlation function diagrams of 100 mM NaOl solution recorded at different pH and 30°C. The solid lines represent the fit to the data based on CONTIN analysis.

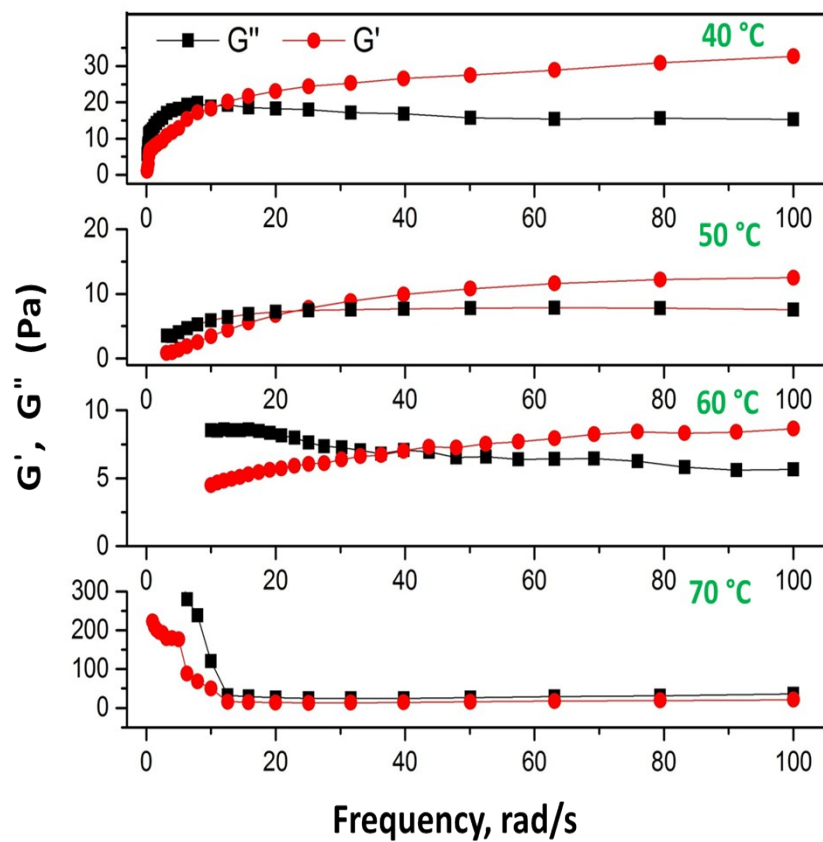

**Fig. 3.** Dynamic rheological responses for 100 mM NaOl (pH~12) micellar solution at different temperature.
